# Supplementary material
Source: PubMed Central journal article supplement (PMC5935596)

**A****Formation of GS iPSC colonies**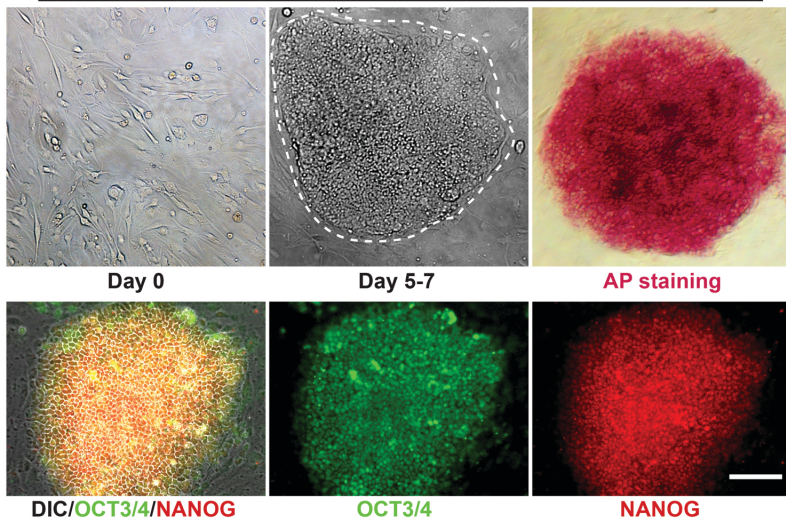**B****Teratoma formation**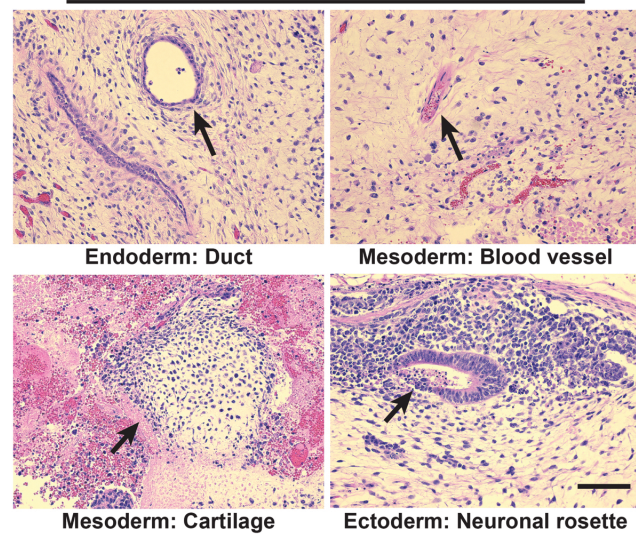**C****Endoderm: liver cells**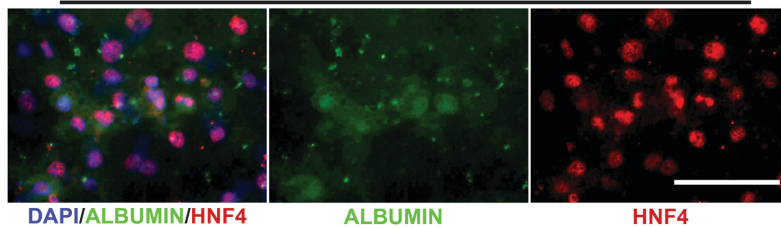**Mesoderm: muscle cells**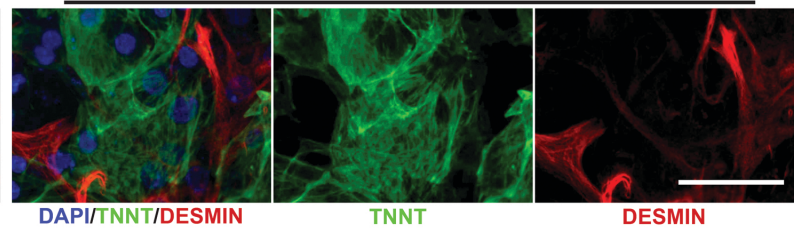**D**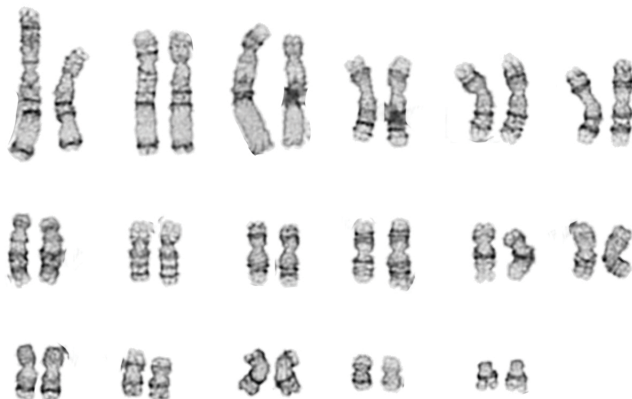**E**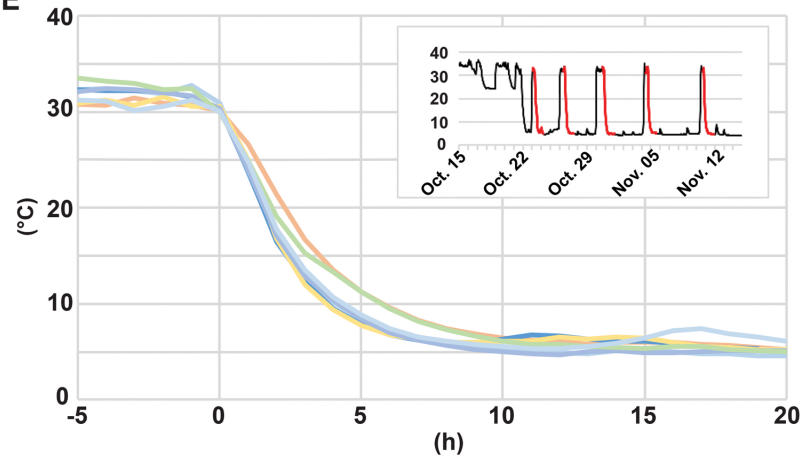

Supplement: NIHMS949188-supplement-4.pdf [file NIHMS949188-supplement-4.pdf]
