# Supplementary material
Source: PubMed Central journal article supplement (PMC5935596)

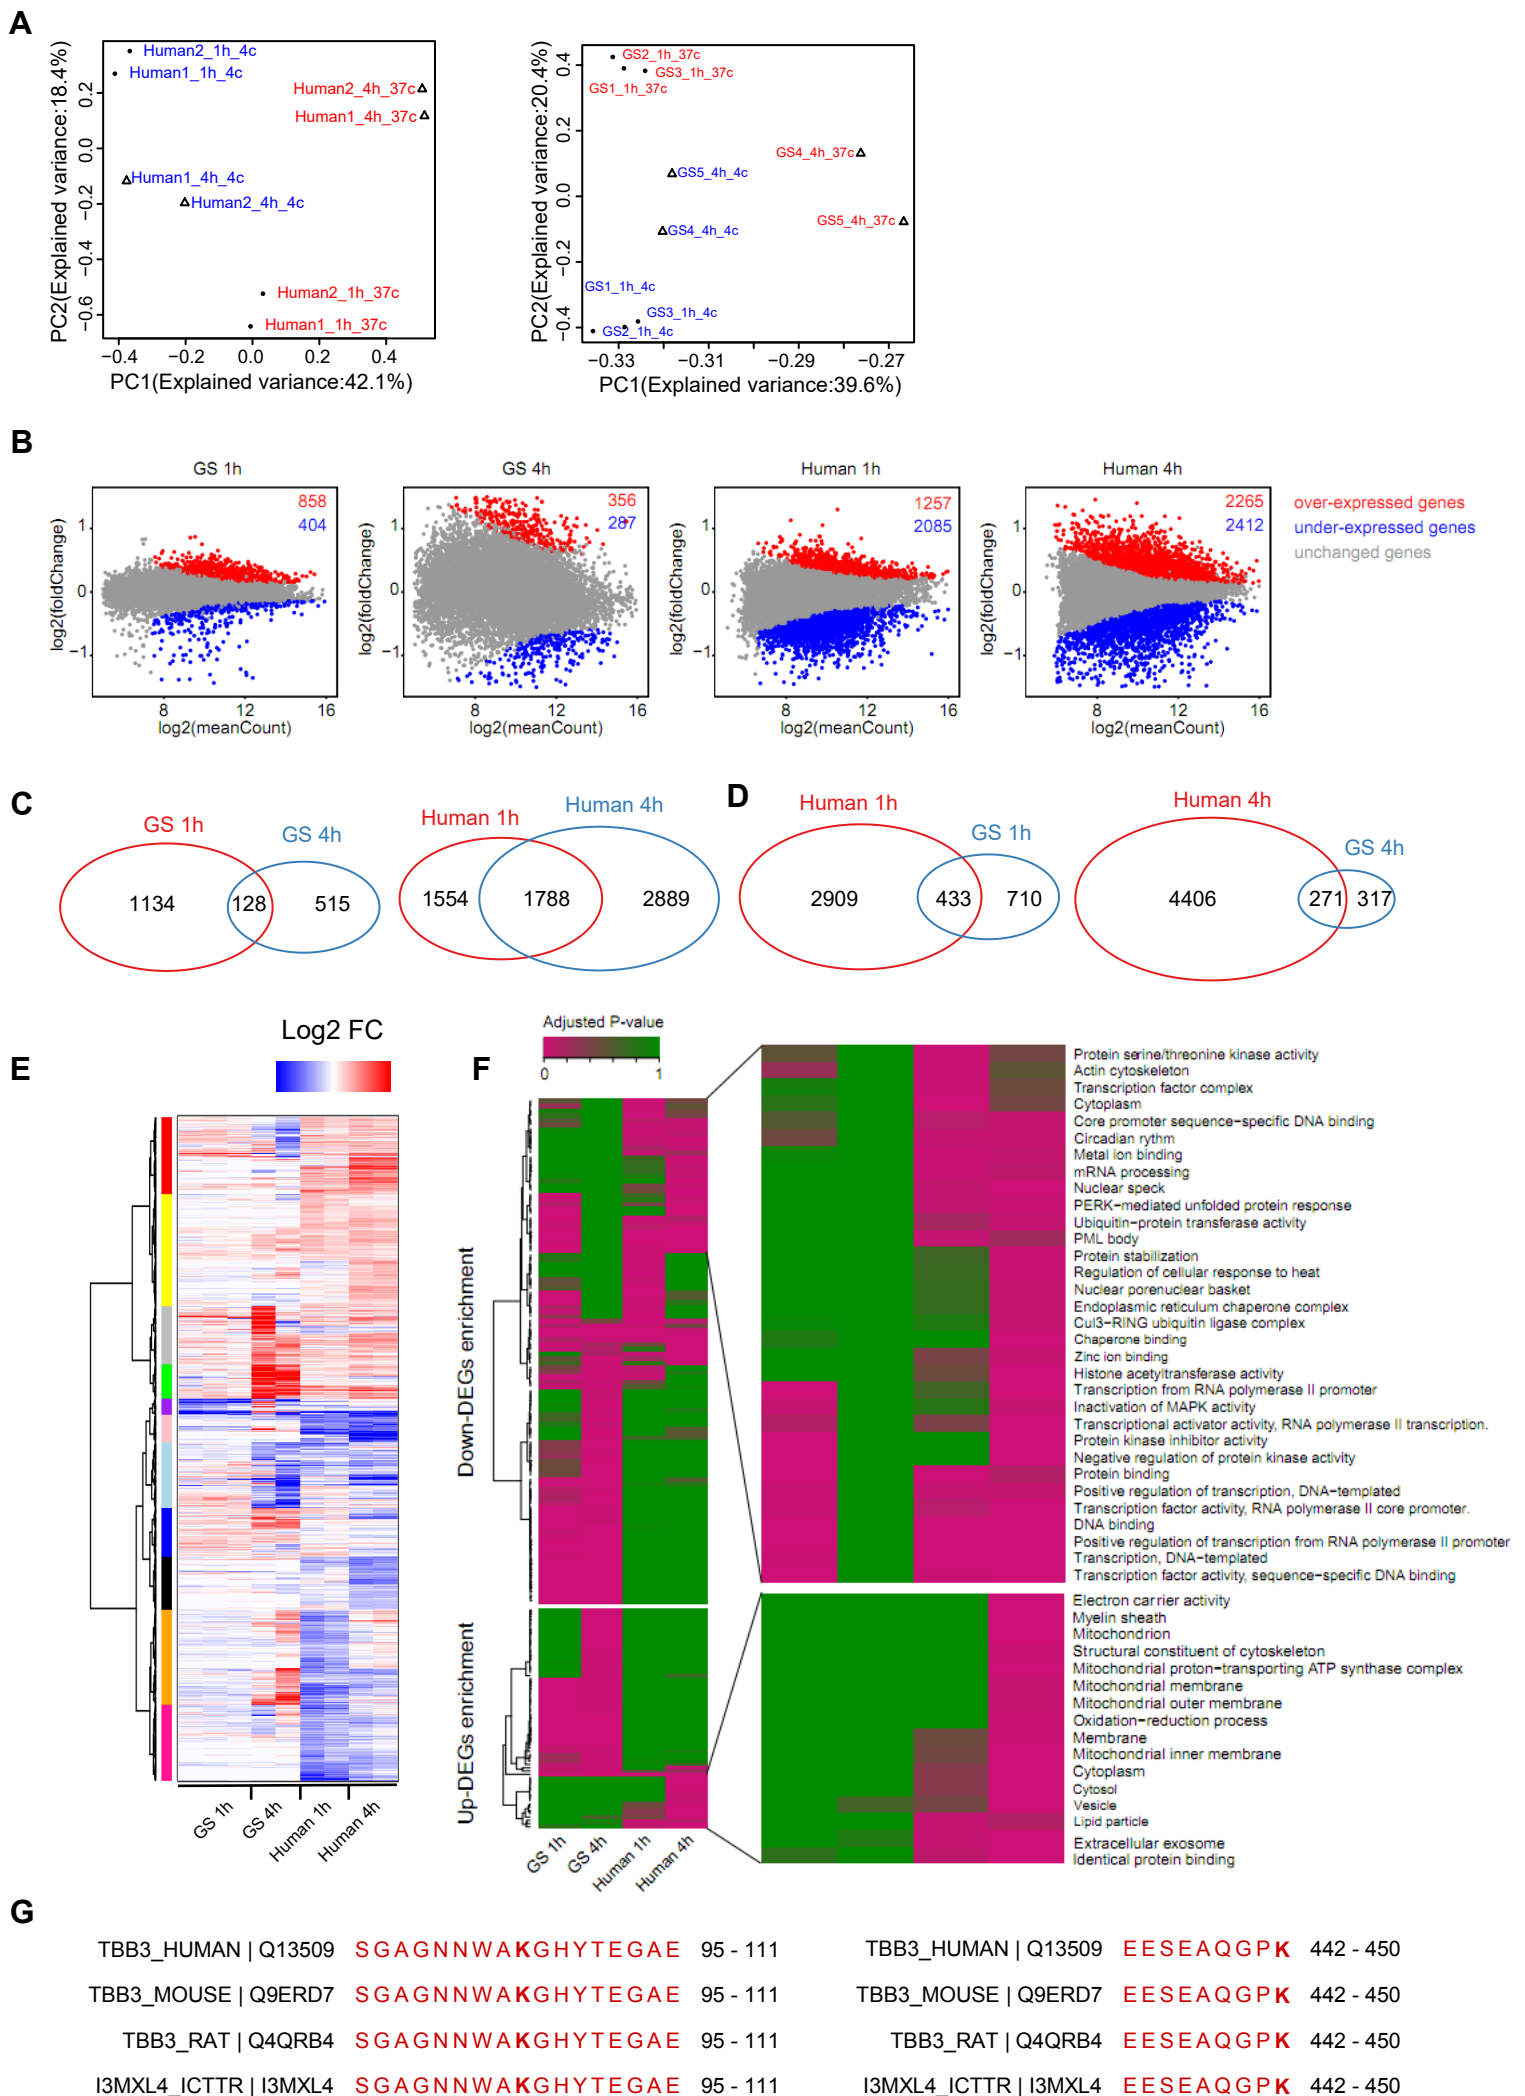

Supplement: NIHMS949188-supplement-6.pdf [file NIHMS949188-supplement-6.pdf]
